# Supplementary material
Source: MDPI journal article supplement (https://www.mdpi.com/2073-4344/9/6/495)
Supplement: s1 [file s1]

## Supplementary Materials

**Table S1.** SEM images of the pristine RGM-PSF membranes with different pore sizes. The scale bar for outer surface, inner surface and cross section is 1  $\mu\text{m}$ , 2  $\mu\text{m}$  and 30  $\mu\text{m}$ , respectively.

| Membrane | Outer surface                                                                       | Inner surface                                                                       | Cross section                                                                         |
|----------|-------------------------------------------------------------------------------------|-------------------------------------------------------------------------------------|---------------------------------------------------------------------------------------|
| #1       | 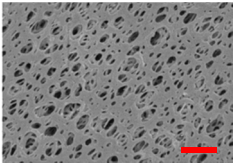   |    |    |
| #2       |    |    |    |
| #3       |   |   |   |
| #4       |  |  |  |

**Table S2.** SEM images of the RGM-PSF membranes with different pore sizes after CRL immobilization. The scale bar for outer surface, inner surface and cross section is 1  $\mu\text{m}$ , 2  $\mu\text{m}$  and 30  $\mu\text{m}$ , respectively.

| Membrane | Outer Surface                                                                      | Inner Surface                                                                      | Cross Section                                                                        |
|----------|------------------------------------------------------------------------------------|------------------------------------------------------------------------------------|--------------------------------------------------------------------------------------|
| #1       | 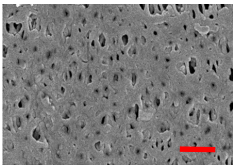  |   |   |
| #2       |   |   |   |
| #3       |   |   |   |
| #4       |  |  |  |

**Table S3.** Bioreactor efficiency under different conditions.

| Membrane | Pressure (MPa)          | TA concentration | $V_r$ (mmol·L <sup>-1</sup> ·min <sup>-1</sup> ) <sup>e</sup> | Bioreactor activity (U·g <sup>-1</sup> ) |
|----------|-------------------------|------------------|---------------------------------------------------------------|------------------------------------------|
| #1       | 0.17 (I/O) <sup>a</sup> | 0.20 M           | 2.17×10 <sup>-2</sup>                                         | 5.86×10 <sup>3</sup>                     |
|          | 0.17 (O/I) <sup>a</sup> | 0.20 M           | 1.92×10 <sup>-2</sup>                                         | 5.01×10 <sup>3</sup>                     |
|          | 0.14 (I/O) <sup>a</sup> | 0.20 M           | 1.44×10 <sup>-2</sup>                                         | 4.05×10 <sup>3</sup>                     |
|          | 0.10 (I/O) <sup>a</sup> | 0.20 M           | 1.11×10 <sup>-2</sup>                                         | 3.91×10 <sup>3</sup>                     |
|          | 0.17 (I/O) <sup>a</sup> | 0.15 M           | 1.23×10 <sup>-2</sup>                                         | 3.23×10 <sup>3</sup>                     |
|          | 0.17 (I/O) <sup>a</sup> | 0.10 M           | 1.13×10 <sup>-2</sup>                                         | 2.82×10 <sup>3</sup>                     |
|          | 0.17 (I/O) <sup>a</sup> | 0.05 M           | 6.11×10 <sup>-3</sup>                                         | 1.41×10 <sup>3</sup>                     |
|          | 0.17 (I/O) <sup>a</sup> | 0.02 M           | 3.99×10 <sup>-3</sup>                                         | 1.32×10 <sup>3</sup>                     |
|          | 0.17 (I/O) <sup>b</sup> | 0.2 M            | 4.06×10 <sup>-2</sup>                                         | 1.07×10 <sup>4</sup>                     |
|          | 0.17 (I/O) <sup>c</sup> | 0.2 M            | 2.80×10 <sup>-2</sup>                                         | 7.64×10 <sup>3</sup>                     |
|          | 0.17 (I/O) <sup>d</sup> | 0.2 M            | 1.78×10 <sup>-2</sup>                                         | 4.55×10 <sup>3</sup>                     |
| #2       | 0.07 (I/O) <sup>a</sup> | 0.20 M           | 5.63×10 <sup>-3</sup>                                         | 1.77×10 <sup>3</sup>                     |
|          | 0.17 (I/O) <sup>a</sup> | 0.20 M           | 1.82×10 <sup>-2</sup>                                         | 4.82×10 <sup>3</sup>                     |
|          | 0.07 (I/O) <sup>a</sup> | 0.20 M           | 6.71×10 <sup>-3</sup>                                         | 2.14×10 <sup>3</sup>                     |
| #3       | 0.17 (I/O) <sup>a</sup> | 0.20 M           | 1.60×10 <sup>-2</sup>                                         | 4.54×10 <sup>3</sup>                     |
|          | 0.07 (I/O) <sup>a</sup> | 0.20 M           | 9.26×10 <sup>-3</sup>                                         | 2.73×10 <sup>3</sup>                     |
| #4       | 0.17 (I/O) <sup>a</sup> | 0.20 M           | 1.02×10 <sup>-2</sup>                                         | 3.14×10 <sup>3</sup>                     |
|          | 0.07 (I/O) <sup>a</sup> | 0.20 M           | 1.33×10 <sup>-2</sup>                                         | 3.64×10 <sup>3</sup>                     |

<sup>a</sup> acetic acid production was operated under the temperature of 25 °C.

<sup>b</sup> acetic acid production was operated under the temperature of 45 °C.

<sup>c</sup> acetic acid production was operated under the temperature of 35 °C.

<sup>d</sup> acetic acid production was operated under the temperature of 15 °C.

<sup>e</sup> the related coefficients of the regression results were all >0.995.

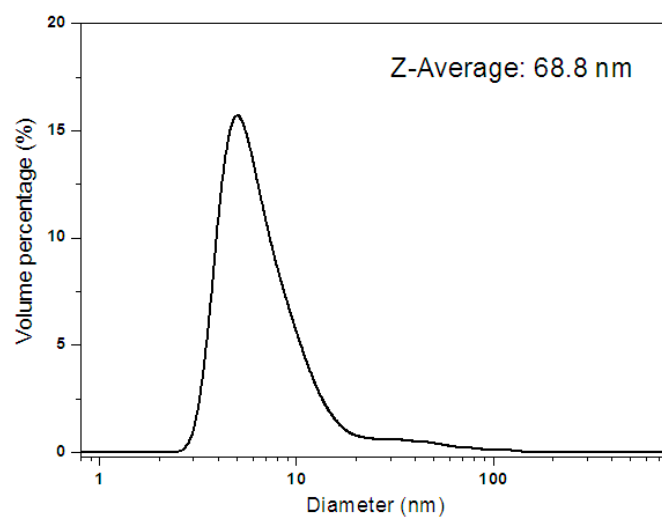

**Figure S1.** Particle size distribution of CRL dissolved in PBS (0.05 M, pH7.0) measured by dynamic light scattering.

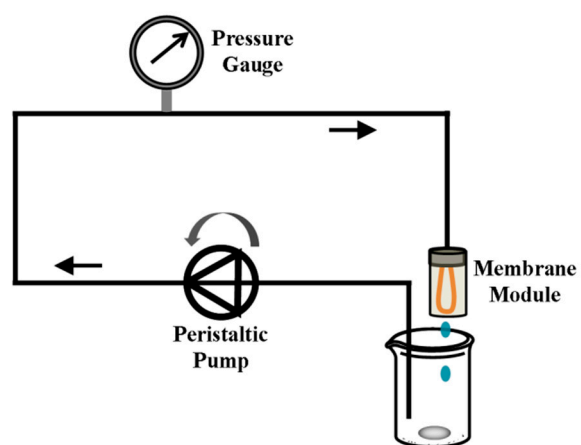

**Figure S2** Diagram of the EMBR.
